# Supplementary material for: mGOASVM: Multi-label protein subcellular localization based on gene ontology and support vector machines
Source: Springer Nature journal article supplement (doi:10.1186/1471-2105-13-290), 2012-11-06

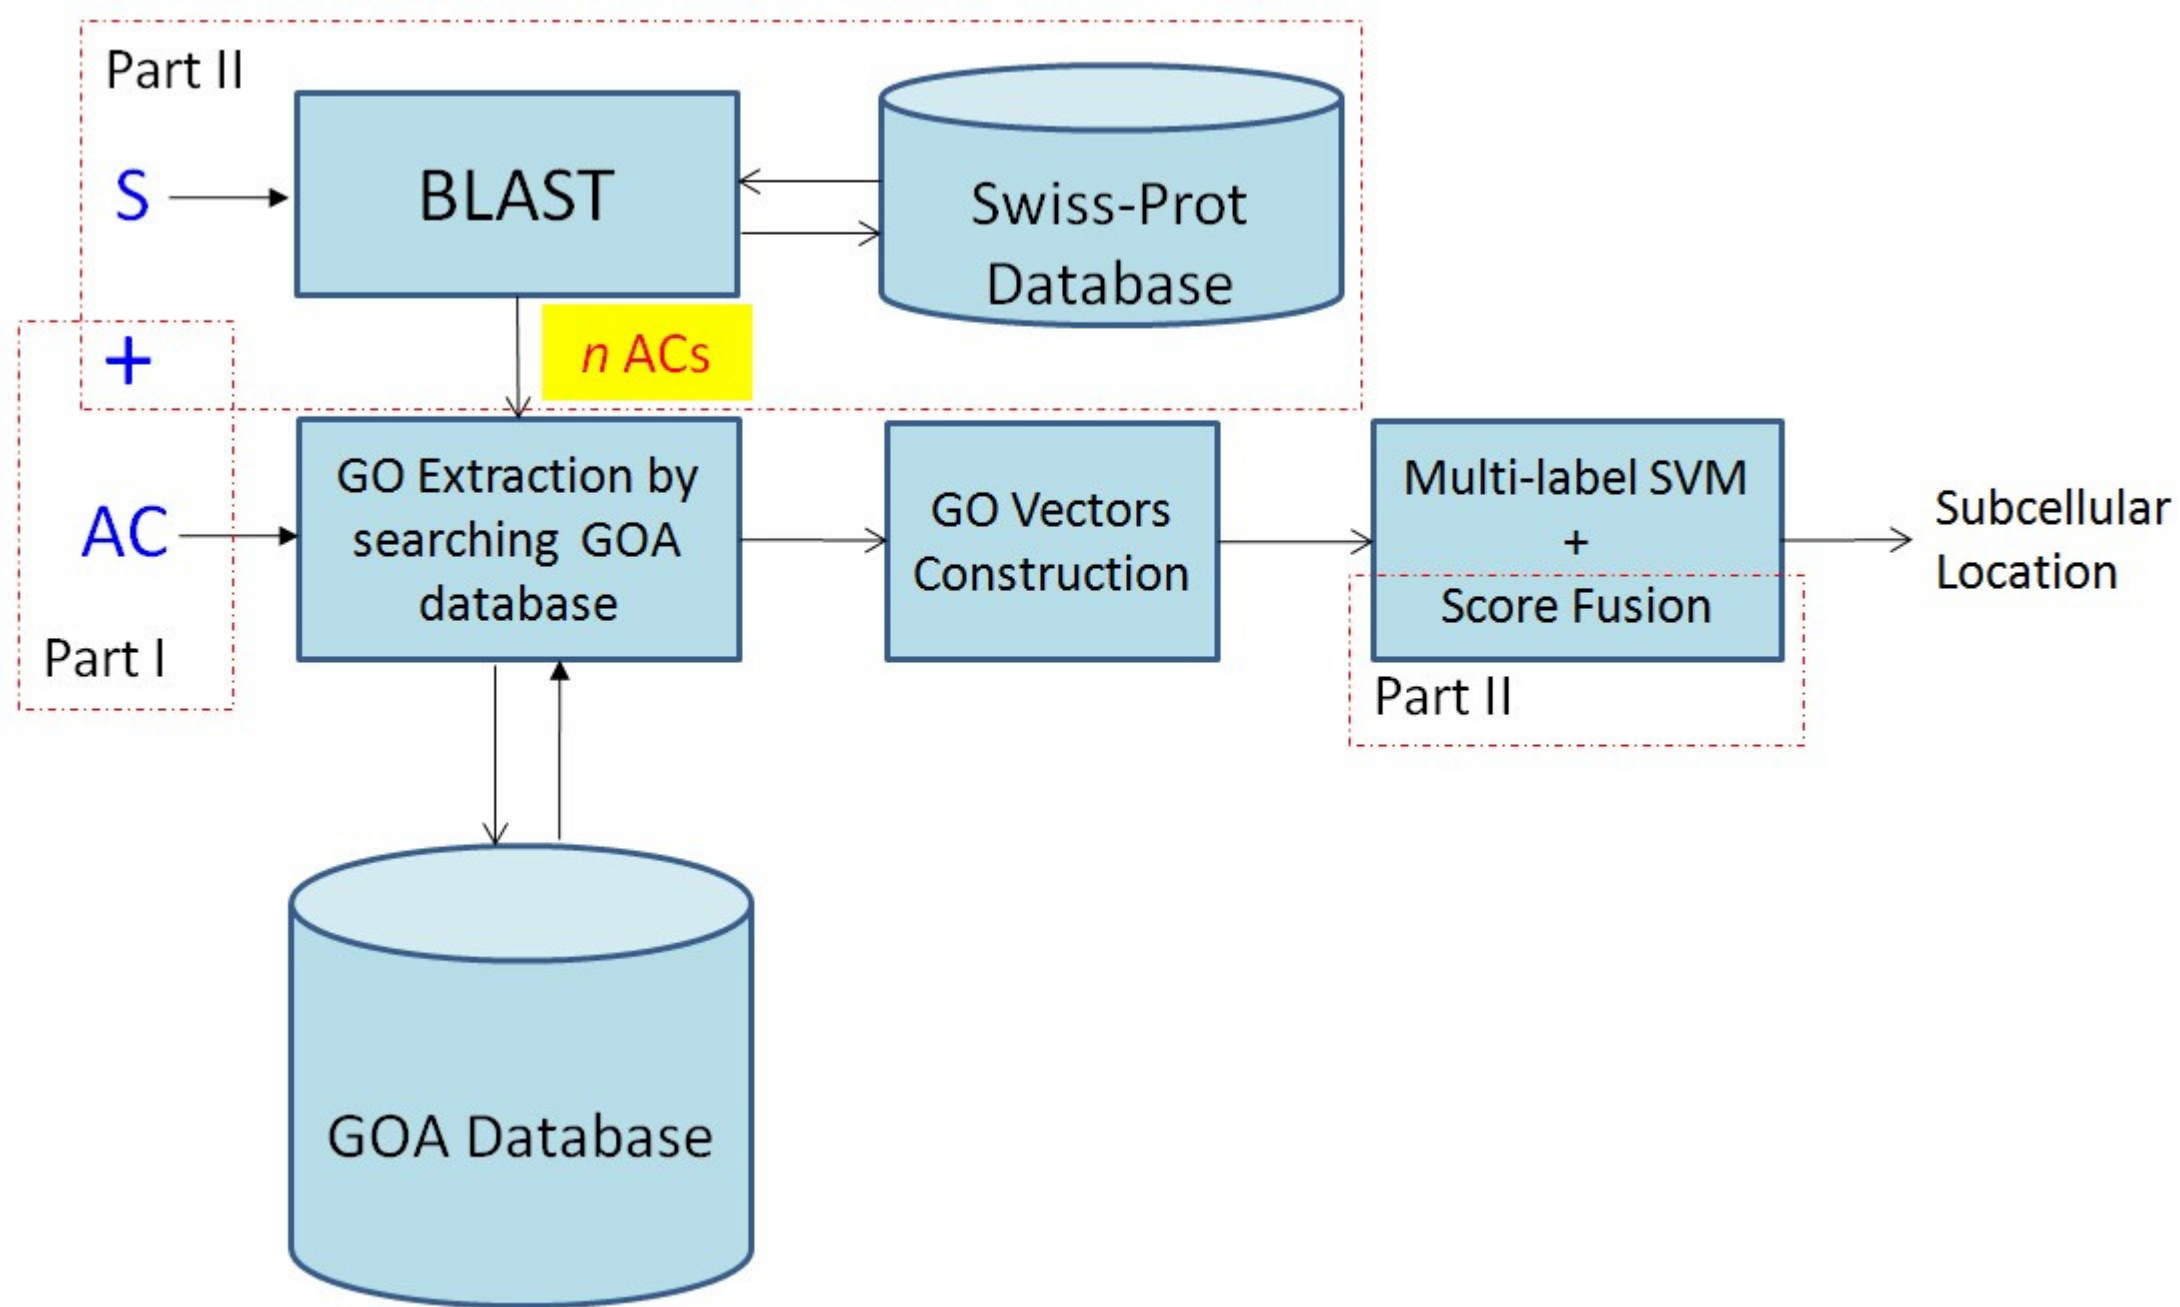

Supplement: 12859_2012_5684_MOESM1_ESM.pdf [file 12859_2012_5684_MOESM1_ESM.pdf]
